# Supplementary material for: Graphitization induced structural transformation of candle soot carbon into carbon nano-onion as a functional anode for metal-ion batteries
Source: Royal Society of Chemistry journal article supplement (doi:10.1039/d2ma00042c), 2022-01-01
Supplement: d2ma00042c1.pdf [file d2ma00042c1.pdf]

## Graphitization induced Structural Transformation of Candle Soot Carbon into Carbon Nano Onion as a Functional Anode for Metal-ion Batteries

Anil D. Pathak<sup>#\*</sup>, Darshna Potphode<sup>#</sup>, Chandra S. Sharma

*Creative & Advanced Research Based On Nanomaterials (CARBON) Laboratory,*

*Department of Chemical Engineering,*

*Indian Institute of Technology Hyderabad, Kandi-502285, Telangana, India*

*\*Corresponding author email: anildaliprasad@iith.ac.in*

<sup>#</sup> Equal contribution

### Section S1

The interlayer spacing ( $d_{002}$ ) (eq.S1) is calculated by Bragg's law, crystallite height ( $L_c$ ) along c-axis (eq.S2) and crystallite size ( $L_a$ ) along a-axis (eq.S3) were evaluated by Debye-Scherrer formula.

$$d_{(002)} = \frac{\lambda}{2 \sin \theta_{(002)}} \quad (\text{S1})$$

$$L_c = \frac{K_1 \lambda}{\beta_{(002)} \cos \theta_{(002)}} \quad (\text{S2})$$

$$L_a = \frac{K_2 \lambda}{\beta_{(100)} \cos \theta_{(100)}} \quad (\text{S3})$$

where,  $\lambda$  is a wavelength of 0.154059 nm for Cu K $\alpha$  radiation.  $\theta_{(002)}$  and  $\theta_{(100)}$  are the Bragg angles corresponding to the diffraction peaks at 25° and 43°, respectively.  $k_1$  (0.94) and  $k_2$  (1.84) are Scherrer parameter for  $L_c$  and  $L_a$ , respectively.  $\beta_{(002)}$  and  $\beta_{(100)}$  is the full width at half maximum (FWHM) for corresponding diffraction peak.

### Section S2

We used Gaussian suite of computer programs with B3LYP functional and 6-31+G(d,p) basis sets to calculate the highest occupied molecule orbital (HOMO) energy and the lowest unoccupied molecule orbital (LUMO) energy [1]. Here, we have modelled graphitic structure by taking four layers of graphene with interlayer distance of graphitized candle soot carbon calculated from XRD pattern (i.e.  $d_{200}$ ) at each graphitization temperature and energy gap evaluated based on difference in HOMO and LUMO energy.

### Section S3

To determine the appropriate kinetic for the given transformation reaction is relatively straightforward with the use of classical Arrhenius equation [2] as follow:

$$\frac{dL_c}{dt} = k_o \exp\left(-\frac{E_A}{RT}\right) \quad (\text{S4})$$

where  $L_c$  is the crystallite size along c axis,  $k_o$  is the pre-exponent kinetic constant,  $E_A$  is the activation energy of the process,  $R$  is the gas constant,  $T$  is the absolute temperature and  $t$  is the time. The above equation can be modified as:

$$\ln\left(\frac{dL_c}{dt}\right) = \ln(k_o) - \frac{E_A}{RT} \quad (\text{S5})$$

By plotting,  $\ln(dL_c/dt)$  versus  $(1/T)$ , the activation energy during graphitization process, can be estimated from the slope of the graph and pre-exponent kinetic constant from the intersection value on y axis.

### Section S4

Therefore, we used the diffraction patterns of graphitized candle soot carbon to evaluate the average crystallite size ( $d_{XRD}$ ) and microstrain ( $\varepsilon$ ) at each graphitization temperature using the Williamson-Hall relation eq. (6) [3,4].

$$\beta_{(Total)} = \beta_{(size)} + \beta_{(strain)} = \frac{K_1 \lambda}{d_{(XRD)} \cos \theta} + 4\varepsilon \tan \theta \quad (\text{S6})$$

where,  $\beta_{(total)}$  is the sum of the full-width at half-maximum (FWHM) of the XRD peak due to FWHM of micro-strain ( $\beta_{(strain)}$ ) and FWHM of crystallite size ( $\beta_{(size)}$ ).  $K_1$  the Debye-Scherrer

constant (0.94),  $\lambda$  the incident X-ray wavelength, and  $\theta$  the diffraction angle.

By plotting  $\frac{\beta_{(total)} \cos \theta}{k_1 \lambda}$  along x-axis and  $\frac{4\varepsilon \sin \theta}{k_1 \lambda}$  along y-axis, the micro-strain ( $\varepsilon$ ) and crystallite size ( $d_{XRD}$ ) may be estimated from the slope of the line and the intersection with the vertical axis, respectively [5,6]

## References

- 1] J. Tirado-Rives, W.L. Jorgensen, Performance of B3LYP density functional methods for a large set of organic molecules, *Journal of Chemical Theory and Computation*. 4 (2008) 297–306. <https://doi.org/10.1021/ct700248k>.
- 2] J.A. Newell, D.D. Edie, E.L. Fuller, Kinetics of carbonization and graphitization of PBO fiber, *Journal of Applied Polymer Science*. 60 (1996) 825–832. [https://doi.org/10.1002/\(SICI\)1097-4628\(19960509\)60:6<825::AID-APP5>3.0.CO;2-L](https://doi.org/10.1002/(SICI)1097-4628(19960509)60:6<825::AID-APP5>3.0.CO;2-L).
- 3] G.K. Williamson, W.H. Hall, X-ray line broadening from filed aluminium and wolfram, *Acta Metallurgica*. 1 (1953) 22–31. [https://doi.org/10.1016/0001-6160\(53\)90006-6](https://doi.org/10.1016/0001-6160(53)90006-6).
- 4] I.F. Cruz, C. Freire, J.P. Araújo, C. Pereira, A.M. Pereira, Multifunctional Ferrite Nanoparticles: From Current Trends Toward the Future, 2018. <https://doi.org/10.1016/B978-0-12-813904-2.00003-6>.
- 5] M.P. Proenca, C.T. Sousa, A.M. Pereira, P.B. Tavares, J. Ventura, M. Vazquez, J.P. Araujo, Size and surface effects on the magnetic properties of NiO nanoparticles, *Physical Chemistry Chemical Physics*. 13 (2011) 9561–9567. <https://doi.org/10.1039/c1cp00036e>.
- 6] C. Fernandes, C. Pereira, M.P. Fernández-García, A.M. Pereira, A. Guedes, R. Fernández-Pacheco, A. Ibarra, M.R. Ibarra, J.P. Araújo, C. Freire, Tailored design of  $\text{Co}_x\text{Mn}_{1-x}\text{Fe}_2\text{O}_4$  nanoferrites: A new route for dual control of size and magnetic properties, *Journal of Materials Chemistry C*. 2 (2014) 5818–5828. <https://doi.org/10.1039/c4tc00429a>.
